# Supplementary material
Source: publisher figshare collection journal article supplement (https://sage.figshare.com/ndownloader/files/15253964)
Supplement: Supplementary file [file 15253964]

---

|                |                           |                      |                  |                       |
|----------------|---------------------------|----------------------|------------------|-----------------------|
| <b>Region:</b> | <b>Executive officer:</b> | <b>Phone number:</b> | <b>Our date:</b> | <b>Our reference:</b> |
| REC central    | Hilde Eikemo              | +47 99572363         | 08.02.2018       | 2018/262/REK midt     |

### To whom it may concern

This is to confirm that the project "5 year results of EVAR used according to instructions for use gives a good general outcome for AAA" with Erney Mattsson as the principal investigator has been evaluated with the intention to decide if the project needs a full ethical review by the committee. The project was found to be a quality assurance project that does not require a full ethical review according to Norwegian Health Research Act § 2.

Yours sincerely,

Hilde Eikemo  
Head of Secretariat  
REC central

>
